# Supplementary material for: Combined temperature and salinity effects on the passive sampling of PAHs with an assessment of impacts to petroleum toxicity
Source: Royal Society of Chemistry journal article supplement (doi:10.1039/d4em00133h), 2024-01-01
Supplement: d4em00133h1.pdf [file d4em00133h1.pdf]

Combined Temperature and Salinity Effects on the Passive Sampling of PAHs with an  
Assessment of Impacts to Petroleum Toxicity

**Ibukun Ola<sup>a\*†</sup>, Carsten Drebenstedt<sup>a</sup>, Robert M. Burgess<sup>b</sup>, Lane Tidwell<sup>c</sup>, Kim  
Anderson<sup>c</sup>, Nils Hoth<sup>a</sup> and Christoph Külls<sup>d</sup>**

*<sup>a</sup>Institute of Mining and Special Civil Engineering, Technical University Mining Academy, Gustav-Zeuner  
Street 1A, Freiberg, 09599, Germany*

*<sup>b</sup>U.S. Environmental Protection Agency, Office of Research and Development, Center for Environmental  
Measurement and Modeling, Atlantic Coastal Environmental Sciences Division, 27 Tarzwell Drive,  
Narragansett, Rhode Island 02882, United States*

*<sup>c</sup>Food Safety & Environmental Stewardship Lab Environmental & Molecular Toxicology Oregon State  
University, United States*

*<sup>d</sup>Labor für Hydrologie und Internationale Wasserwirtschaft, Technische Hochschule Lübeck, Lübeck,  
23562, Schleswig-Holstein, Germany*

**SUPPORTING INFORMATION**

\* Corresponding Author: Ibukun Ola (Ibukun.Ola@doktorand.tu-freiberg.de)

Table S1. Salt composition used in the partitioning experiments.

| Salt                                                              | 0‰   | 18‰   | 36‰   |
|-------------------------------------------------------------------|------|-------|-------|
| NaCl                                                              | 0    | 10.5  | 21    |
| Na <sub>2</sub> SO <sub>4</sub>                                   | 0    | 1.76  | 3.52  |
| KCl                                                               | 0    | 0.31  | 0.62  |
| KBr                                                               | 0    | 0.044 | 0.088 |
| Na <sub>2</sub> B <sub>4</sub> O <sub>7</sub> ·10H <sub>2</sub> O | 0    | 0.017 | 0.034 |
| MgCl <sub>2</sub> ·6H <sub>2</sub> O                              | 0    | 4.75  | 9.5   |
| CaCl <sub>2</sub> ·2H <sub>2</sub> O                              | 0    | 0.66  | 1.32  |
| SrCl <sub>2</sub> ·6H <sub>2</sub> O                              | 0    | 0.01  | 0.02  |
| NaHCO <sub>3</sub>                                                | 0    | 0.09  | 0.17  |
| NaN <sub>3</sub>                                                  | 0.05 | 0.05  | 0.05  |
|                                                                   | 0.05 | 18.19 | 36.32 |

Table S2. Initial concentrations of test compounds in replicate PE samples.

| PAH                     | Replicate 1 | Replicate 2 | Replicate 3 | Average<br>± SD |
|-------------------------|-------------|-------------|-------------|-----------------|
|                         | (µg/PE)     |             |             |                 |
| 2-methylnaphthalene     | 4.88        | 5.44        | 5.08        | 5.13±0.28       |
| Acenaphthene            | 9.23        | 9.56        | 9.42        | 9.40±0.17       |
| 2,6-dimethylnaphthalene | 11.6        | 12.2        | 11.8        | 11.9±0.31       |
| Fluorene                | 9.45        | 9.65        | 9.64        | 9.58±0.11       |
| Phenanthrene            | 11.7        | 12.1        | 11.9        | 11.9±0.20       |
| 1-methylfluorene        | 18.3        | 18.7        | 18.5        | 18.5±0.20       |
| Fluoranthene            | 19.4        | 20.0        | 19.8        | 19.7±0.31       |
| Pyrene                  | 22.6        | 23.4        | 23.1        | 23.0±0.40       |
| 2-ethylanthracene       | 35.9        | 37.0        | 36.3        | 36.4±0.56       |
| 1-methylpyrene          | 30.4        | 32.3        | 31.0        | 31.5±1.00       |
| Benzo(a)anthracene      | 32.5        | 34.0        | 34.0        | 33.6±0.95       |
| Benzo[e]pyrene          | 39.2        | 39.0        | 41.6        | 39.9±1.45       |
| Benzo(a)pyrene          | 48.6        | 48.3        | 51.0        | 49.5±1.77       |
| 7,12-                   | 34.3        | 34.1        | 35.0        | 34.8±0.9        |

|                                  |      |      |      |               |
|----------------------------------|------|------|------|---------------|
| <b>dimethylbenz[a]anthracene</b> |      |      |      | 9             |
| <b>Benzo[ghi]perylene</b>        | 69.3 | 66.6 | 75.2 | 70.4±4.4<br>0 |

Table S3. Sampling event details including temperature and salinity at Grand Isle, Louisiana (2010-2011). Originally reported by Tidwell *et al.*<sup>1</sup>

| <b>Sampling Event</b> | <b>Time</b>                     | <b>Deployment period (d)</b> | <b>Average temperature (° C)</b> | <b>Salinity (g/L)</b> |
|-----------------------|---------------------------------|------------------------------|----------------------------------|-----------------------|
| <b>May</b>            | May 10 – 13 (2010)              | 3                            | 27.85                            | 35                    |
| <b>June - 1</b>       | June 8 – 11 (2010)              | 4                            | 32.85                            | 35                    |
| <b>June - 2</b>       | June 11 – July 7 (2010)         | 28                           | 26.85                            | 35                    |
| <b>August</b>         | August 5 – September 8 (2010)   | 34                           | 27.85                            | 35                    |
| <b>Sept</b>           | September 8 – October 13 (2010) | 34                           | 31.85                            | 35                    |
| <b>March</b>          | February 9 – March 15 (2011)    | 35                           | 27.85                            | 35                    |
| <b>April</b>          | March 15 – April 29 (2011)      | 45                           | 24.85                            | 35                    |
| <b>May</b>            | April 29 – June 8 (2011)        | 38                           | 26.85                            | 35                    |

Table S4. Monitored PAHs at Grand Isle, Louisiana (LA) sampling station (from Tidwell *et al.*<sup>1</sup>).

| <b>PAH</b>                  | <b>Abbreviation</b> |
|-----------------------------|---------------------|
| <b>Naphthalene</b>          | NAP                 |
| <b>Methylnaphthalene</b>    | 1NAP                |
| <b>Dimethylnaphthalene</b>  | 2NAP                |
| <b>Acenaphthylene</b>       | ACY                 |
| <b>Acenaphthene</b>         | ACE                 |
| <b>Fluorene</b>             | FLO                 |
| <b>Dibenzothiophene</b>     | DBT                 |
| <b>Phenanthrene</b>         | PHE                 |
| <b>Methylphenanthrene</b>   | 1PHE                |
| <b>Dimethylphenanthrene</b> | 2PHE                |
| <b>Anthracene</b>           | ANT                 |
| <b>Methylanthracene</b>     | 1ANT                |
| <b>Dimethylanthracene</b>   | 2ANT                |
| <b>Fluoranthene</b>         | FLA                 |
| <b>Pyrene</b>               | PYR                 |
| <b>Methylpyrene</b>         | 1PYR                |
| <b>Retene</b>               | RTN                 |
| <b>Benz(a)anthracene</b>    | BAA                 |
| <b>Chrysene</b>             | CHR                 |
| <b>Methylchrysene</b>       | 1CHR                |
| <b>Benzo(b)fluoranthene</b> | BBF                 |

|                                |     |
|--------------------------------|-----|
| <b>Benzo(k)fluoranthene</b>    | BKF |
| <b>Benzo(e)pyrene</b>          | BEP |
| <b>Benzo(a)pyrene</b>          | BAP |
| <b>Indeno(1,2,3-c,d)pyrene</b> | IPY |
| <b>Dibenz(a,h)anthracene</b>   | DBA |
| <b>Benzo(ghi)perylene</b>      | BPL |
| <b>Dibenzo(a,l)pyrene</b>      | DBP |

Table S5. Values of the molecular parameters for selected PAHs used for the correlation plots including log  $K_{ow}$ , molecular weight (MW) and molecular volume ( $M_{vol}$ ).

| <b>PAH</b>                            | <b>Log <math>K_{ow}</math></b> | <b>MW</b> | <b>Mvol</b><br>mL/mol |
|---------------------------------------|--------------------------------|-----------|-----------------------|
| <b>2-methylnaphthalene</b>            | 3.88 <sup>b</sup>              | 142.2     | 144.6                 |
| <b>Acenaphthene</b>                   | 3.97 <sup>b</sup>              | 154.21    | 150.8                 |
| <b>2,6-dimethylnaphthalene</b>        | 4.31 <sup>a</sup>              | 156.23    | 161.16                |
| <b>Fluorene</b>                       | 4.14 <sup>b</sup>              | 166.22    | 161.41                |
| <b>Phenanthrene</b>                   | 4.62 <sup>c</sup>              | 178.23    | 172.03                |
| <b>1-methylfluorene</b>               | 4.97 <sup>a</sup>              | 180.25    | 177.97                |
| <b>Fluoranthene</b>                   | 5.34 <sup>c</sup>              | 202.26    | 188.6                 |
| <b>Pyrene</b>                         | 5.41 <sup>c</sup>              | 202.26    | 188.6                 |
| <b>2-ethylanthracene</b>              | 5.85 <sup>a</sup>              | 206.29    | 205.39                |
| <b>1-methylpyrene</b>                 | 5.68 <sup>b</sup>              | 216.28    | 205.16                |
| <b>Benzo(a)anthracene</b>             | 5.97 <sup>c</sup>              | 228.29    | 216.02                |
| <b>Benzo[e]pyrene</b>                 | 6.44 <sup>a</sup>              | 252.32    | 232.59                |
| <b>Benzo(a)pyrene</b>                 | 6.69 <sup>c</sup>              | 252.32    | 232.59                |
| <b>7,12-dimethylbenz[a]anthracene</b> | 7.01 <sup>b</sup>              | 256.35    | 249.14                |
| <b>Benzo[ghi]perylene</b>             | 7.24 <sup>c</sup>              | 276.34    | 249.17                |

a) 2

b) 3

c) 4

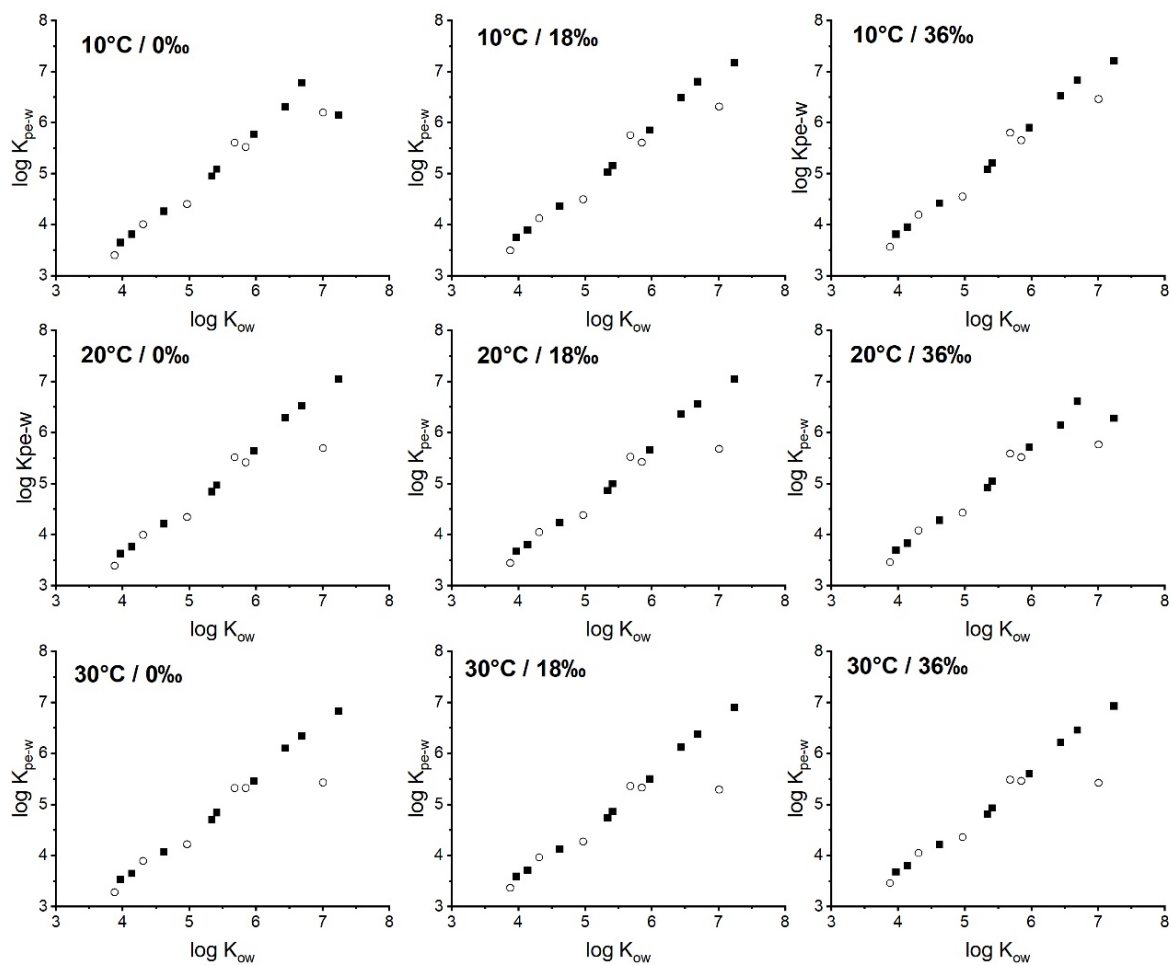

Figure S1. Plots of  $\log K_{PE-W}$  versus  $\log K_{OW}$  determined at different treatments (i.e., under combined temperature and salinity regimes). Solid squares and open circles represent parent- and alkylated-PAHs, respectively. PAH (open circle) consistently below the other molecules is 7,12 dimethyl benz[a]anthracene.

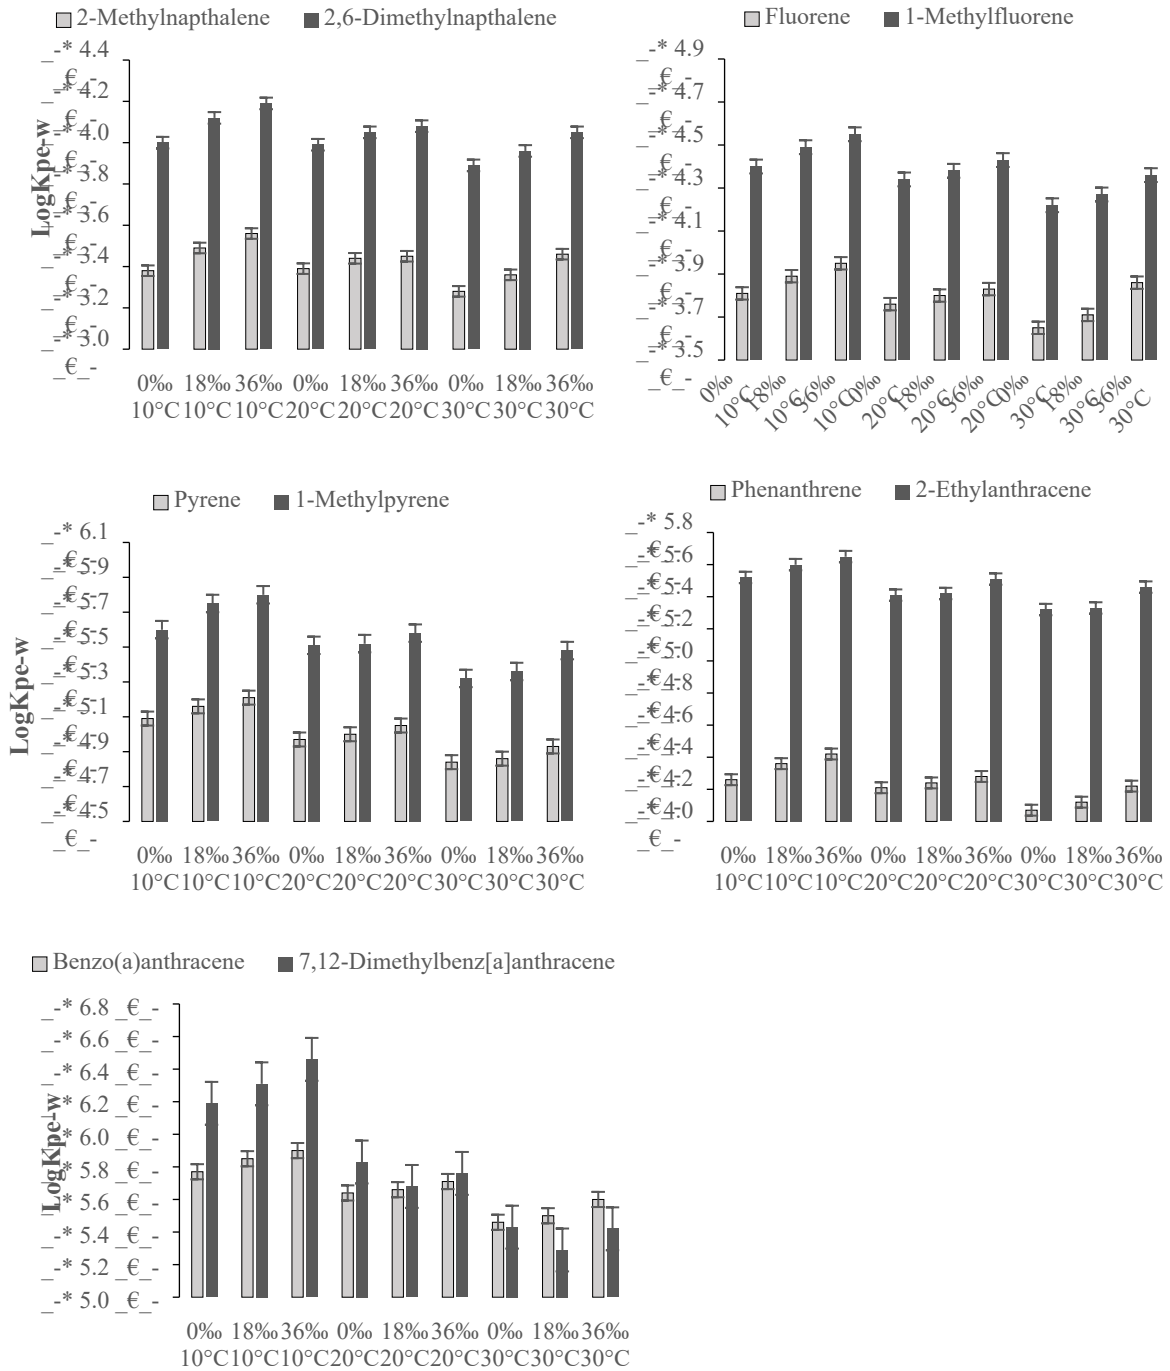

Figure S2. Influence of the addition of a methyl group on  $\log K_{PE-W}$  values of selected PAHs.

Table S6. Log  $K_{PE-W}$  values determined under standard conditions (20°C, deionized water) in the present study as compared to values reported in the literature. Move to SI?

| Source                                              | (Cornelissen et al. 2008) | (Fernandez et al. 2009) | Reitsma et al. (2013) | Perron et al. (2013) | (Choi et al. 2013b) | (Smedes et al. 2009) | (Hale et al. 2010) | (Bao et al. 2012) | (Belles et al. 2016) | (Lei et al. 2020) | (Jonker 2022) | This study |
|-----------------------------------------------------|---------------------------|-------------------------|-----------------------|----------------------|---------------------|----------------------|--------------------|-------------------|----------------------|-------------------|---------------|------------|
| <b>Polymer thickness (<math>\mu\text{m}</math>)</b> | 100                       | 25                      | 25                    | 25                   | 51                  | 70                   | 26                 | 50                | 100                  | nd                | 25            | 70         |
| <b>Equilibration period (weeks)</b>                 | nd                        | nd                      | 3                     | 8                    | 11                  | 8.7                  | 2                  | 52                | 12                   | nd                | 12            | 11         |
| PAH                                                 | Log $K_{PE-W}$            |                         |                       |                      |                     |                      |                    |                   |                      |                   |               |            |
| <b>2-methylnaphthalene</b>                          | nd                        | nd                      | 3.66±0.08             | nd                   | 3.31±0.05           | nd                   | nd                 | nd                | nd                   | nd                | nd            | 3.39±0.09  |
| <b>Acenaphthene</b>                                 | nd                        | nd                      | 3.74±0.02             | 3.60±0.04            | 3.53±0.03           | 3.16 ±0.14           | nd                 | 4.25±0.12         | 3.60 ±0.07           | nd                | nd            | 3.63±0.09  |
| <b>2,6-dimethylnaphthalene</b>                      | nd                        | nd                      | nd                    | 4.01±0.01            | 3.85±0.04           | nd                   | nd                 | nd                | nd                   | nd                | nd            | 3.99±0.09  |
| <b>Fluorene</b>                                     | 3.78± 0.04                | nd                      | 3.75±0.05             | 3.92±0.02            | 3.67±0.04           | 3.77 ±0.11           | nd                 | 4.51±0.12         | 3.70 ±0.10           | nd                | nd            | 3.76±0.09  |
| <b>Phenanthrene</b>                                 | 4.14±0.02                 | 4.3±0.1                 | 4.39±0.03             | 4.08±0.07            | 4.04±0.03           | 4.22 ±0.11           | 4.17±0.05          | 4.78±0.12         | 4.11±0.14            | 4.45±0.01         | 4.18±0.01     | 4.21±0.09  |
| <b>1-methylfluorene</b>                             | nd                        | nd                      | nd                    | nd                   | 4.15±0.05           | nd                   | nd                 | nd                | nd                   | nd                | nd            | 4.34±0.09  |
| <b>Fluoranthene</b>                                 | 4.85±0.02                 | 4.9±0.1                 | 5.09±0.04             | 4.85±0.06            | 4.75±0.03           | 4.93 ±0.09           | nd                 | 4.93±0.14         | 5.00±0.07            | 4.89±0.01         | 4.83±0.00     | 4.84±0.08  |
| <b>Pyrene</b>                                       | 5.02±0.03                 | 4.7±0.1                 | 5.22±0.02             | 5.00±0.08            | 4.89±0.03           | 5.10 ±0.07           | 5.01±0.12          | 5.07±0.14         | 5.25±0.21            | 5.10±0.01         | 4.97±0.00     | 4.97±0.08  |
| <b>2-ethylanthracene</b>                            | nd                        | nd                      | nd                    | nd                   | 5.25±0.02           | nd                   | nd                 | nd                | nd                   | nd                | nd            | 5.41±0.09  |
| <b>1-methylpyrene</b>                               | nd                        | nd                      | 5.74±0.05             | nd                   | 5.41±0.04           | nd                   | nd                 | nd                | nd                   | nd                | nd            | 5.51±0.12  |
| <b>Benzo(a)anthracene</b>                           | 5.62±0.02                 | 5.5±0.1                 | 5.91±0.03             | 5.46±0.19            | 5.43±0.04           | 5.73 ±0.11           | nd                 | 5.79±0.15         | 6.22±0.25            | 5.67±0.02         | 5.65±0.01     | 5.64±0.09  |
| <b>Benzo[e]pyrene</b>                               | 6.27±0.09                 | nd                      | nd                    | 5.43±0.29            | 6.04±0.05           | 6.41±0.05            | nd                 | nd                | nd                   | nd                | 6.31±0.01     | 6.29±0.06  |
| <b>Benzo(a)pyrene</b>                               | 6.22±0.12                 | 6.4±0.1                 | 6.81±0.03             | 5.75±0.31            | 6.14±0.06           | 6.75 ±0.05           | nd                 | nd                | 7.24±0.21            | 6.02±0.02         | 6.52±0.01     | 6.52±0.06  |
| <b>7,12-dimethylbenz[a]anthracene</b>               | nd                        | nd                      | 6.55±0.05             | nd                   | 6.23±0.03           | nd                   | nd                 | nd                | nd                   | nd                | nd            | -          |
| <b>Benzo[ghi]perylene</b>                           | 5.81±0.07                 | nd                      | 6.37±0.04             | 5.81±0.84            | 6.23±0.08           | 7.27 ±0.14           | nd                 | 7.36±0.04         | 6.83±0.17            | 6.17±0.02         | 7.09±0.02     | 7.05±0.07  |

nd Not determined or reported; -

Value not included due to anomalous behaviour of 7,12-dimethylbenz[a]anthracene with polymer.

Table S7. Change in log  $K_{PE-W}$  value per °C for individual PAH derived using the slope of the log  $K_{PE-W}$  – temperature correlation plots given in Figure 2 (main text).

| PAH                                   | 0%             | 18%            | 36%            |
|---------------------------------------|----------------|----------------|----------------|
| <b>2-Methylnaphthalene</b>            | -0.0058±0.0014 | -0.0065±0.0056 | -0.0054±0.0015 |
| <b>Acenaphthene</b>                   | -0.006±0.0019  | -0.0079±0.0036 | -0.0066±0.0012 |
| <b>2,6-Dimethylnaphthalene</b>        | -0.0054±0.0022 | -0.0081±0.0053 | -0.0069±0.0014 |
| <b>Fluorene</b>                       | -0.008±0.0022  | -0.0088±0.0042 | -0.0077±0.0009 |
| <b>Phenanthrene</b>                   | -0.0096±0.0025 | -0.0117±0.0039 | -0.0097±0.0008 |
| <b>1-Methylfluorene</b>               | -0.0091±0.0019 | -0.0108±0.0043 | -0.0096±0.0006 |
| <b>Fluoranthene</b>                   | -0.0123±0.0018 | -0.0144±0.0065 | -0.0136±0.0003 |
| <b>Pyrene</b>                         | -0.0129±0.0019 | -0.0146±0.0063 | -0.0139±0.0005 |
| <b>2-Ethylanthracene</b>              | -0.0102±0.0046 | -0.0137±0.0056 | -0.0095±0.0032 |
| <b>1-Methylpyrene</b>                 | -0.0142±0.0025 | -0.0193±0.0029 | -0.0159±0.0017 |
| <b>Benzo(a)anthracene</b>             | -0.0153±0.003  | -0.0172±0.0036 | -0.0151±0.0026 |
| <b>Benzo[e]pyrene</b>                 | -0.0106±0.0054 | -0.0183±0.0066 | -0.015±0.0029  |
| <b>Benzo(a)pyrene</b>                 | -0.0219±0.0101 | -0.0231±0.0064 | -0.0142±0.0031 |
| <b>7,12-Dimethylbenz[a]anthracene</b> | -              | -              | -              |
| <b>Benzo[ghi]perylene</b>             | <sup>-2</sup>  | -0.0134±0.0173 | -0.011±0.0123  |

- Values not included in the table due to anomalous behaviour of 7,12-dimethylbenz[a]anthracene with PE.

<sup>-2</sup> Value not included in the table because  $K_{PE-W}$  value at 30°C > than value at 10°C.



Table S8. Derived thermodynamic parameters explaining the partitioning of PAHs to PE at 293K.

| PAH                                   | $\Delta H_{PE-W}$<br>(kJ/mol) | $T\Delta S$<br>(kJ/mol) | $\Delta G$<br>(kJ/mol) |
|---------------------------------------|-------------------------------|-------------------------|------------------------|
| <b>2-Methylnaphthalene</b>            | -9.63±0.86                    | 9.18±0.83               | -18.82±0.12            |
| <b>Acenaphthene</b>                   | -9.8±2.9                      | 10.5±2.8                | -20.34±0.09            |
| <b>2,6-Dimethylnaphthalene</b>        | -8.9±3.4                      | 13.4±3.5                | -22.21±0.12            |
| <b>Fluorene</b>                       | -13.1±3.5                     | 7.9±3.5                 | -20.96±0.14            |
| <b>Phenanthrene</b>                   | -15.6±4.0                     | 7.8±3.9                 | -23.44±0.08            |
| <b>1-Methylfluorene</b>               | -14.9±2.9                     | 9.3±3.0                 | -24.21±0.16            |
| <b>Fluoranthene</b>                   | -20.2±2.8                     | 6.9±2.7                 | -27.09±0.12            |
| <b>Pyrene</b>                         | -21.1±3.0                     | 6.7±2.9                 | -27.85±0.12            |
| <b>2-Ethylanthracene</b>              | -16.8±7.5                     | 13.6±7.4                | -30.38±0.18            |
| <b>1-Methylpyrene</b>                 | -23.1±3.8                     | 7.6±3.7                 | -30.71±0.15            |
| <b>Benzo(a)anthracene</b>             | -25.2±4.8                     | 6.4±4.9                 | -31.55±0.17            |
| <b>Benzo[e]pyrene</b>                 | -22.3±1.9                     | 12.6±2.1                | -34.9±0.18             |
| <b>Benzo(a)pyrene</b>                 | -36±17                        | 0.74±16.27              | -36.72±0.38            |
| <b>7,12-Dimethylbenz[a]anthracene</b> | -                             | -                       | -                      |
| <b>Benzo[ghi]perylene</b>             | -22±29                        | 18±28                   | -39.46±0.32            |

- Values not included in the table due to anomalous behaviour of chemical with PE.

Table S9. Change in log  $K_{pe-w}$  values per unit salinity (‰) for individual chemical derived using the slope of the log  $K_{pe-w}$  – salinity correlation plots given in Figure 5 (main text).

| PAH                                   | 10°C          | 20°C          | 30°C          |
|---------------------------------------|---------------|---------------|---------------|
| <b>2-Methylnaphthalene</b>            | 0.0047±0.001  | 0.003±0       | 0.0049±0.0007 |
| <b>Acenaphthene</b>                   | 0.0045±0.0007 | 0.003±0.0006  | 0.0041±0.0013 |
| <b>2,6-Dimethylnaphthalene</b>        | 0.0053±0.001  | 0.0037±0.0001 | 0.0045±0.0019 |
| <b>Fluorene</b>                       | 0.004±0.0005  | 0.0031±0.0008 | 0.0042±0.0012 |
| <b>Phenanthrene</b>                   | 0.0044±0.0003 | 0.0029±0.0002 | 0.0044±0.0007 |
| <b>1-Methylfluorene</b>               | 0.0043±0.0004 | 0.0037±0.0009 | 0.0041±0.0011 |
| <b>Fluoranthene</b>                   | 0.0037±0.0007 | 0.003±0.0007  | 0.003±0.0005  |
| <b>Pyrene</b>                         | 0.0033±0.0008 | 0.0028±0.0008 | 0.0027±0.0005 |
| <b>2-Ethylanthracene</b>              | 0.0037±0.0016 | 0.0037±0.0011 | 0.004±0.0007  |
| <b>1-Methylpyrene</b>                 | 0.0057±0.0011 | 0.0031±0.0006 | 0.0047±0.0013 |
| <b>Benzo(a)anthracene</b>             | 0.0036±0.0012 | 0.0029±0.0004 | 0.0038±0.0016 |
| <b>Benzo[e]pyrene</b>                 | 0.0057±0.0013 | <sup>-2</sup> | 0.0033±0.0022 |
| <b>Benzo(a)pyrene</b>                 | 0.0028±0.0006 | 0.0025±0.0006 | 0.0034±0.0021 |
| <b>7,12-Dimethylbenz[a]anthracene</b> | -             | -             | -             |
| <b>Benzo[ghi]perylene</b>             | <sup>-3</sup> | <sup>-2</sup> | 0.0028±0.0017 |

- Values not included in the table due to anomalous behaviour of 7,12-Dimethylbenz[a]anthracene with PE.

<sup>-2</sup>  $K_{PE\_W}$  values at 36‰ < values at 0‰.

<sup>-3</sup> Value not included because  $K_{PE\_W}$  determined at 10°C, 0‰ is significantly different from those determined at 10°C, 18‰ and 10°C, 36‰.

Table S10. Chemical-specific correct equations for the combined effects of temperature and salinity on  $K_{PE-W}$  values.

| PAH                            | Equation                                              |
|--------------------------------|-------------------------------------------------------|
| 2-Methylnaphthalene            | $\log K_{pe-w}(T,S) = 3.39 - 0.0058*(T-20) + 0.003*S$ |
| Acenaphthene                   | $\log K_{pe-w}(T,S) = 3.63 - 0.006*(T-20) + 0.003*S$  |
| 2,6-Dimethylnaphthalene        | $\log K_{pe-w}(T,S) = 3.99 - 0.0054*(T-20) + 0.003*S$ |
| Fluorene                       | $\log K_{pe-w}(T,S) = 3.76 - 0.008*(T-20) + 0.003*S$  |
| Phenanthrene                   | $\log K_{pe-w}(T,S) = 4.21 - 0.0096*(T-20) + 0.003*S$ |
| 1-Methylfluorene               | $\log K_{pe-w}(T,S) = 4.34 - 0.0091*(T-20) + 0.003*S$ |
| Fluoranthene                   | $\log K_{pe-w}(T,S) = 4.84 - 0.0123*(T-20) + 0.003*S$ |
| Pyrene                         | $\log K_{pe-w}(T,S) = 4.97 - 0.0129*(T-20) + 0.003*S$ |
| 2-Ethylanthracene              | $\log K_{pe-w}(T,S) = 5.41 - 0.0102*(T-20) + 0.003*S$ |
| 1-Methylpyrene                 | $\log K_{pe-w}(T,S) = 5.51 - 0.0142*(T-20) + 0.003*S$ |
| Benzo(a)anthracene             | $\log K_{pe-w}(T,S) = 5.64 - 0.0153*(T-20) + 0.003*S$ |
| Benzo[e]pyrene                 | $\log K_{pe-w}(T,S) = 6.29 - 0.0106*(T-20) + 0.003*S$ |
| Benzo(a)pyrene                 | $\log K_{pe-w}(T,S) = 6.52 - 0.0219*(T-20) + 0.003*S$ |
| 7,12-Dimethylbenz[a]anthracene | -                                                     |
| Benzo[ghi]perylene             | $\log K_{pe-w}(T,S) = 7.05 - 0.0134*(T-20) + 0.003*S$ |

- Values not included in the table due to anomalous behaviour of 7,12-Dimethylbenz[a]anthracene with PE.

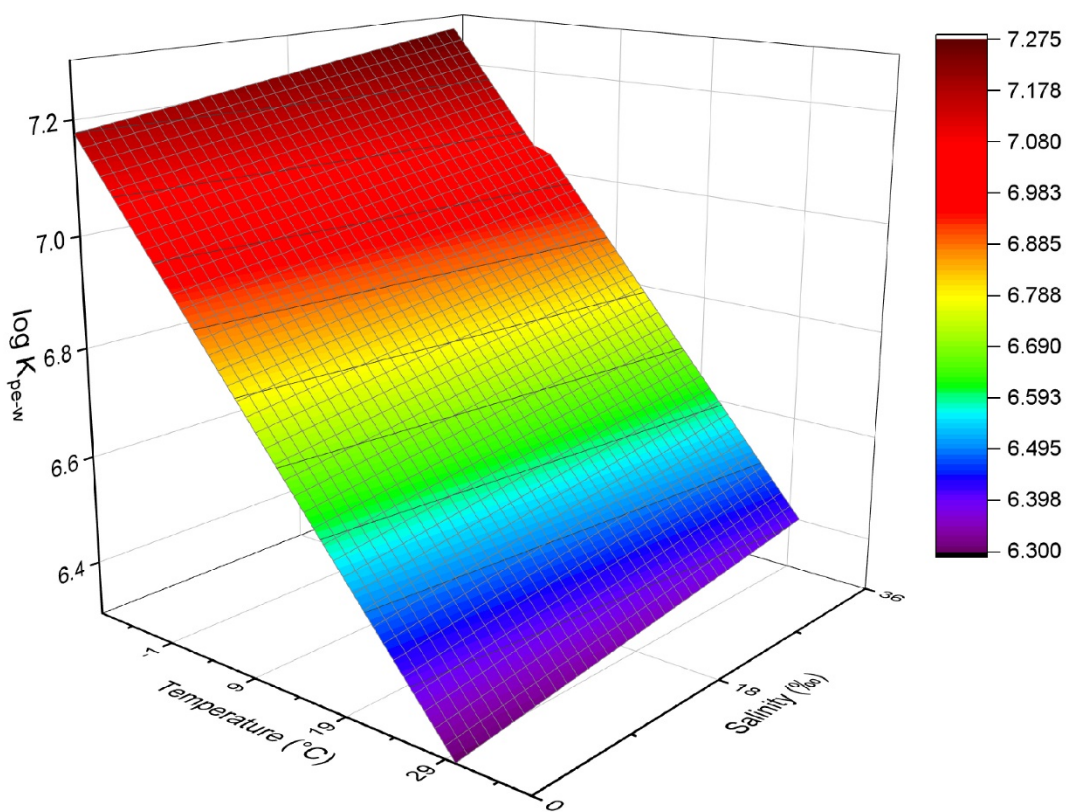

Figure S3. Surface plot of temperature and salinity effects on the log K<sub>PE-W</sub> of benzo(a)pyrene.

*Details on the calculation of freely dissolved concentrations from the Deepwater Horizon oil spill*

The freely dissolved aqueous concentration ( $C_{free}$ ) of the monitored PAHs were estimated using the model (Equation 1) from Huckins *et al.* <sup>5</sup> and Smedes & Booij <sup>6</sup>

$$C_{free} = \frac{N_{PE}}{m_p * K_{PE-W} * DEQ} \quad [1]$$

where  $C_{free}$  is in units of  $\mu\text{g L}^{-1}$ ,  $N_{PE}$  is the target PAH amounts accumulated in the PE ( $\mu\text{g}$ ) and  $m_p$  represents PE mass (g) while  $K_{PE-W}$  and  $DEQ$  are the PE-water partition coefficient ( $\text{L kg}^{-1}$ ) and the degree of equilibrium (unitless) reached during exposure (based on the PRCs), respectively. The  $DEQ$  term is used to account for non-equilibrium condition and was derived for all target PAHs using the mass transfer model (Equation 2) from Smedes and Booij <sup>6</sup>:

$$DEQ = 1 - \exp\left(\frac{R_s * t}{m_p * K_{PE-W}}\right) \quad [2]$$

where  $R_s$  is the (equivalent) water sampling rate and  $t$  represents exposure period (d).

The  $K_{PE-W}$  values used here were estimated from an empirical relationship derived from our previous study (*In preparation*, Table S2).  $R_s$  values were estimated using a mechanistic model (Equation 3) derived by Rusina *et al.* <sup>7</sup>:

$$R_s = \frac{B}{MW^{0.47}} \quad [3]$$

where  $B$  is an exposure specific term that accounts for the effect of flow on uptake rate while  $MW$  is the molecular weight of the target analyte. The factor  $MW^{0.47}$  accounts for the effect of molecular size on  $R_s$ .  $B$  is derived using nonlinear least-squares (NLS) method <sup>8</sup> by fitting the PRC fraction retained ( $f_{ret}$ ) as a function of  $K_{PE-W} MW^{0.47}$ .

The entire calculation procedure was initially conducted using  $K_{PE-W}$  values determined under the standard conditions (i.e. 20°C, 0‰). Subsequently, to account for location-specific variations, the calculations were repeated with  $K_{PE-W}$  values adjusted for

temperature and salinity. These adjusted values were obtained by applying Equation 11 (Main text). By comparing the results obtained from the two sets of calculations, the extent to which adjusting the  $K_{PE-W}$  values for temperature and salinity influences the final data could be quantified.

## References

- 1 L. G. Tidwell, S. E. Allan, S. G. O'Connell, K. A. Hobbie, B. W. Smith and K. A. Anderson, PAH and OPAH flux during the deepwater horizon incident, *Environmental Science & Technology*, 2016, **50**, 7489–7497.
- 2 U. EPA, Estimation programs interface suite™ for Microsoft® windows, v 4.11, *United States Environmental Protection Agency, Washington, DC, USA*, 2012.
- 3 Y.-G. Ma, Y. D. Lei, H. Xiao, F. Wania and W.-H. Wang, Critical review and recommended values for the physical-chemical property data of 15 polycyclic aromatic hydrocarbons at 25 C, *Journal of Chemical & Engineering Data*, 2010, **55**, 819–825.
- 4 M. T. O. Jonker, Determining octanol-water partition coefficients for extremely hydrophobic chemicals by combining "slow stirring" and solid-phase microextraction, *Environmental toxicology and chemistry*, 2016, **35**, 1371–1377.
- 5 J. N. Huckins, J. D. Petty and K. Booij, *Monitors of organic chemicals in the environment: semipermeable membrane devices*, Springer, 2006.
- 6 F. Smedes and K. Booij, Guidelines for passive sampling of hydrophobic contaminants in water using silicone rubber samplers, 2012.
- 7 T. P. Rusina, F. Smedes, M. Koblizkova and J. Klanova, Calibration of silicone rubber passive samplers: experimental and modeled relations between sampling rate and compound properties, *Environmental Science & Technology*, 2010, **44**, 362–367.
- 8 K. Booij and F. Smedes, An improved method for estimating in situ sampling rates of nonpolar passive samplers, *Environmental Science & Technology*, 2010, **44**, 6789–6794.
